# Supplementary material
Source: PubMed Central journal article supplement (PMC2859560)
Supplement: supp_M109.063628_jbc.M109.063628-1.pdf [file supp_M109.063628_jbc.M109.063628-1.pdf]

Supplemental Figure S1

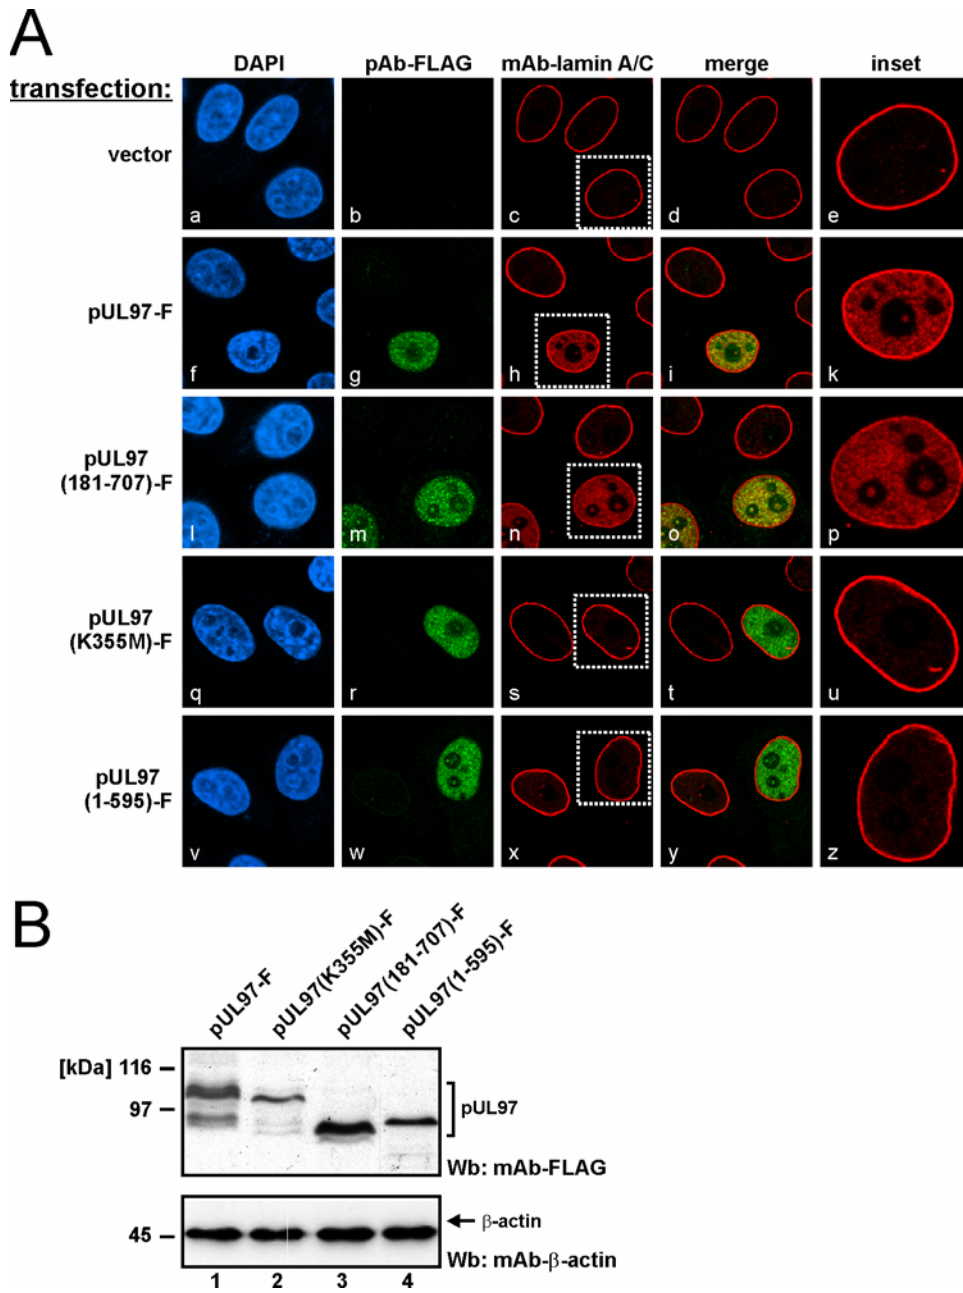

**Fig. S1.** Morphological alteration of the nuclear lamina induced by pUL97. HeLa cells (A) or 293T cells (B) were transfected with constructs expressing catalytically active or inactive mutants of pUL97. (A) Confocal laser-scanning microscopy. At 2 days post-transfection, cells were fixed and coimmunostained with pAb-FLAG and mAb-lamin A/C (using FITC- or Cy3-conjugated secondary antibodies, respectively). Cell nuclei were counterstained with DAPI (panels a, f, l, q and v). Inset images (panels e, k, p, u and z) show enlarged nuclei of cells expressing kinase-active (panels f-p) or kinase-inactive (panels q-z) pUL97, respectively. (B) Expression levels of pUL97 mutants. At 2 days post-transfection, cells were lysed and subjected to semi-quantitative Wb analysis using mAb-FLAG or mAb-β-actin.

**Supplemental Figure S2**

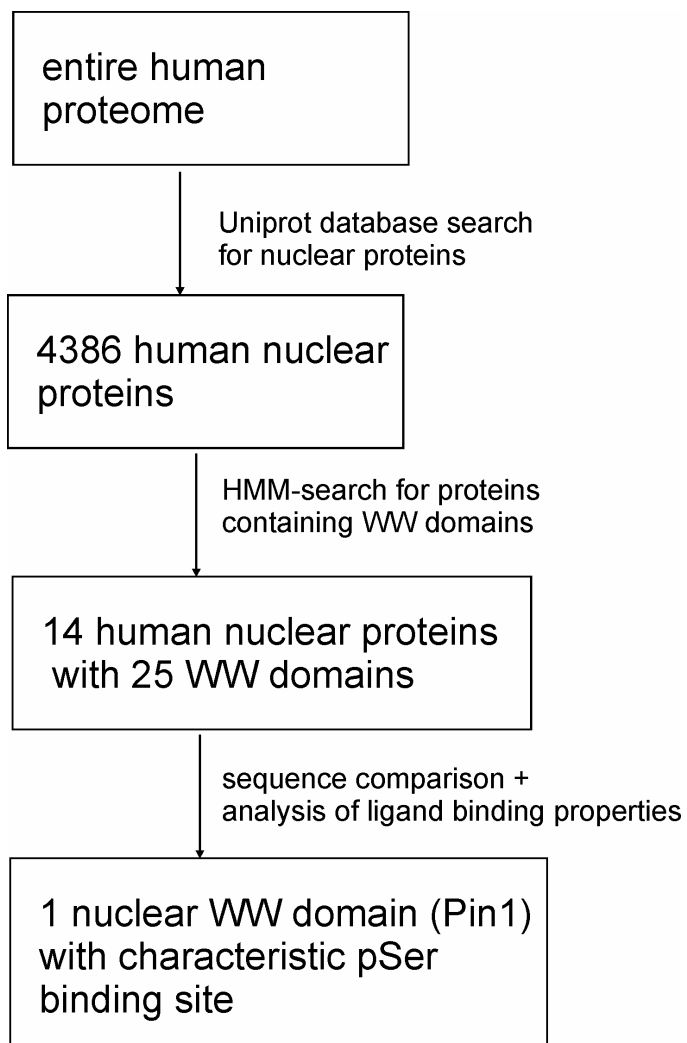

**Fig. S2.** Flowchart for the prediction of interaction partners of the phosphorylated lamins (see text for details).

### Supplemental Figure S3

| E-value | score | N | Sequence    | Description                               |
|---------|-------|---|-------------|-------------------------------------------|
| 4.6e-49 | 172.7 | 4 | ITCH_HUMAN  | E3 ubiquitin-protein ligase Itchy homolog |
| 2e-31   | 116.4 | 3 | SMUF2_HUMAN | E3 ubiquitin-protein ligase SMURF2        |
| 9e-23   | 88.7  | 3 | TCRG1_HUMAN | Transcription elongation regulator 1      |
| 4e-20   | 80.2  | 2 | PR40A_HUMAN | Pre-mRNA-processing factor 40 homolog     |
| 4.5e-17 | 70.5  | 2 | WVOX_HUMAN  | WW domain-containing oxidoreductase       |
| 1.2e-16 | 69.1  | 2 | WBP4_HUMAN  | WW domain-binding protein 4               |
| 1.7e-16 | 68.6  | 2 | PR40B_HUMAN | Pre-mRNA-processing factor 40 homolog     |
| 4.2e-13 | 57.8  | 1 | PIN1_HUMAN  | Peptidyl-prolyl cis-trans isomerase       |
| 6.3e-13 | 57.2  | 1 | MAGI3_HUMAN | Membrane-associated guanylate kinase      |
| 3.7e-08 | 42.0  | 1 | WWTR1_HUMAN | transcription regulator protein 1         |
| 6.7e-07 | 37.9  | 1 | SETD2_HUMAN | Histone-lysine N-methyltransferase        |
| 3.4e-06 | 35.7  | 1 | APBB1_HUMAN | Amyloid beta A4 precursor protein-binding |
| 7.6e-06 | 34.6  | 1 | WAC_HUMAN   | WW domain-containing adapter protein      |
| 1.3e-05 | 33.8  | 1 | PQBP1_HUMAN | Polyglutamine-binding protein 1           |

**Fig. S3.** List of the human nuclear proteins containing at least one WW domain. The hits were obtained from a HMM search as described in methods. The E values and score of the hit are given in the first two columns. N denotes the number of WW domains present in each hit. The UniProt Sequence Identifier and a short description are given for each hit.

## Supplemental Figure S4

```
ITCH_HUMAN/328-357      ---LPPGWQRVD-QHGRVYYVDHVEKRTTWDRP
ITCH_HUMAN/360-389      ---LPPGWERRVD-NMGRVYYVDHFTRTTWQRP
ITCH_HUMAN/440-469      ---LPPGWKRTD-SNGRVYFVNHNRITQWEDP
ITCH_HUMAN/480-509      ---LPEGWEMRFT-VDGIPYFVDHNRRTTYIDP
SMUF2_HUMAN/159-188     ---LPDGWEERRT-ASGRIQYLNHITRITQWERP
SMUF2_HUMAN/253-282     ---LPEGYEQRTT-QQGQVYFLHTQTGVSTWHP
SMUF2_HUMAN/299-328     ---LPPGWEIRNT-ATGRVYFVDHNNRITQFTDP
TCRG1_HUMAN/134-162     -ee---IWVENKT-PDGKVYYYNARTRESAWTKP
TCRG1_HUMAN/432-460     --v--SEWTEYKT-ADGKTYYYNRTLESTWEKP
TCRG1_HUMAN/530-559     -pg--TPWCVVWT-GDERVFFYNPTTRLMSWDRP
PR40A_HUMAN/142-171     --a-KSMWTEHKS-PDGRVYYNTETKQSTWEKP
PR40A_HUMAN/183-212     ---SKCPWKEYKS-DSGKPYYYNSQTKESRWAKP
WWOX_HUMAN/18-47        ---LPPGWEERTT-KDGWVYANHTTEKTQWEHP
WWOX_HUMAN/59-88        ---LPYGWEQETD-ENGQVFFVDHINKRRTYLDP
WBP4_HUMAN/124-153      --s-KGRWVEGIT-SEGYHYYYDLISGASQWEKP
WBP4_HUMAN/165-194      vkt---VWVEGLS-EDGFVYYNTEETGESRWEKP
PR40B_HUMAN/95-123      ral---WSEHVA-PDGRVYYNADDKQSVWEKP
PR40B_HUMAN/135-164     --s-QCPWKEYKS-DTGKPYYYNQSKESTRWRP
PIN1_HUMAN/7-37         ---LPPGWKRMSRSSGRVYFVNHITNASQWERP
MAGI3_HUMAN/295-324     ---LPKNWEMAYT-DTGMIYFIDHNTKTTTWLDP
WWTR1_HUMAN/126-155     ---LPPGWEMFTT-ATGQRYFLNHIEKITTWQDP
SETD2_HUMAN/2391-2420   ---LPPNWKATARD-PEGKIYYYHVITRQTQWDPP
APBB1_HUMAN/255-283     ---LPAGWMRVQD-TSG-TYYWHIPTGTTQWEPP
WAC_HUMAN/131-160       sad---DWSEHIS-SSGKYYYNCRTEVVSQWEKP
PQBP1_HUMAN/48-78      ---LPPSWYKVFDPSCGLPYWYWNADTDLVSWLSP
```

**Fig. S4.** Multiple sequence alignment of the WW domains detected by the sequence search shown in Fig. S3. For each protein, the UniProt Sequence Identifier and the sequence position of the respective WW domain is listed. The key arginine in Pin1 required for the recognition of phosphorylated ligands is highlighted in bold. WW domains, for which experimentally determined complex structures are available, are marked in blue and their structural analysis is shown in Fig. S4.

## Supplemental Figure S5

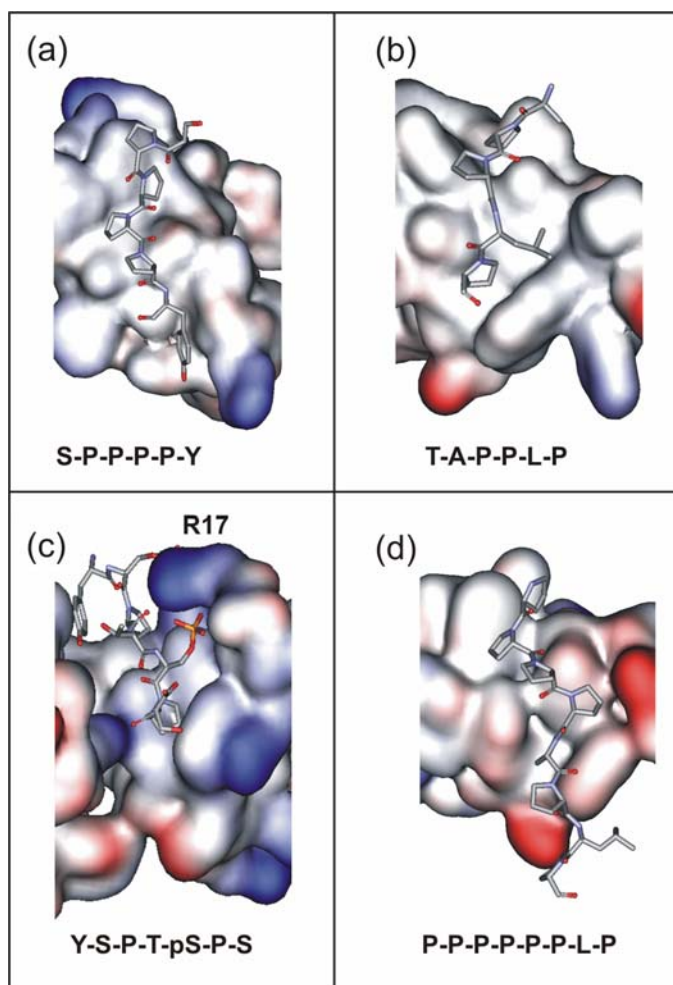

**Fig. S5.** Structure and ligand binding properties of several nuclear human WW domains. The experimentally determined complex structures of the WW domains from ICHT\_HUMAN (a), PR40A\_HUMAN (b), PIN1\_HUMAN (c), and APBB1\_HUMAN (d) are shown. WW domains are shown in space-filled presentation and are colored according to their charge. Ligands are shown in stick presentation, and their sequence is given below the structure. Note the presence of a unique arginine (R17) in Pin1 which has no equivalent in the other WW domains.
